# Supplementary material
Source: PubMed Central journal article supplement (PMC4808214)
Supplement: AAC.02600-15_zac004165011so1.pdf [file AAC.02600-15_zac004165011so1.pdf]

|                                 | C <sub>max</sub> (µg/ml) |             |         | AUC <sub>0-8</sub> (µg-h/ml) |               |         | t <sub>1/2</sub> (µg-h/ml) |             |         |
|---------------------------------|--------------------------|-------------|---------|------------------------------|---------------|---------|----------------------------|-------------|---------|
|                                 | N                        | Mean (SD)   | p-value | N                            | Mean (SD)     | p-value | N                          | Mean (SD)   | p-value |
| Age on day of PK                |                          |             |         |                              |               |         |                            |             |         |
| 0-6 months                      | 20                       | 7.73 (1.97) |         | 20                           | 25.88 (9.37)  |         | 19                         | 2.11 (0.69) |         |
| 7-12 months                     | 19                       | 8.11 (1.79) | 0,535   | 19                           | 23.41 (7.27)  | 0,365   | 19                         | 1.89 (0.69) | 0,330   |
| Nutritional status on day of PK |                          |             |         |                              |               |         |                            |             |         |
| ≥-2.0                           | 21                       | 7.87 (2.17) |         | 21                           | 25.93 (10.62) |         | 20                         | 2.20 (0.85) |         |
| <-2.0                           | 18                       | 7.96 (1.50) | 0,885   | 18                           | 23.22 (4.55)  | 0,297   | 18                         | 1.77 (0.34) | 0,046   |
| Prematurity                     |                          |             |         |                              |               |         |                            |             |         |
| Term (38+ weeks)                | 24                       | 8.12 (1.82) |         | 24                           | 25.10 (7.51)  |         | 23                         | 1.96 (0.74) |         |
| Premature (<37 weeks)           | 15                       | 7.59 (1.95) | 0,392   | 15                           | 24.01 (9.89)  | 0,700   | 15                         | 2.05 (0.61) | 0,723   |
| HIV status                      |                          |             |         |                              |               |         |                            |             |         |
| HIV-infected                    | 5                        | 7.95 (2.30) |         | 5                            | 21.97 (7.45)  |         | 5                          | 1.73 (0.22) |         |
| HIV-uninfected                  | 34                       | 7.91 (1.84) | 0,967   | 34                           | 25.08 (8.55)  | 0,446   | 33                         | 2.04 (0.73) | 0,071   |
| Ethnicity                       |                          |             |         |                              |               |         |                            |             |         |
| African                         | 29                       | 8.11 (1.85) |         | 29                           | 25.36 (8.96)  |         | 29                         | 2.03 (0.72) |         |
| Mixed race                      | 10                       | 7.35 (1.90) | 0,277   | 10                           | 22.72 (6.49)  | 0,398   | 9                          | 1.89 (0.58) | 0,597   |
| Gender                          |                          |             |         |                              |               |         |                            |             |         |
| Female                          | 13                       | 8.30 (1.81) |         | 13                           | 27.09 (10.20) |         | 13                         | 2.21 (0.72) |         |
| Male                            | 26                       | 7.72 (1.90) | 0,372   | 26                           | 23.48 (7.26)  | 0,209   | 25                         | 1.89 (0.66) | 0,173   |

**Table S1. Isoniazid pharmacokinetic parameters by age, nutritional status, prematurity, HIV status, ethnicity, and gender (n = 39)**

WAZ, weight for age Z score; C<sub>max</sub>, maximum drug concentration in serum; AUC, the area under the concentration-time curve; t<sub>1/2</sub>, half-life of the drug; SD, standard deviation

|                                 | C <sub>max</sub> (µg/ml) |               |         | AUC <sub>0-8</sub> (µg-h/ml) |                |         | t <sub>1/2</sub> (µg-h/ml) |             |         |
|---------------------------------|--------------------------|---------------|---------|------------------------------|----------------|---------|----------------------------|-------------|---------|
|                                 | N                        | Mean (SD)     | p-value | N                            | Mean (SD)      | p-value | N                          | Mean (SD)   | p-value |
| Age at PK sampling              |                          |               |         |                              |                |         |                            |             |         |
| 0-6 months                      | 20                       | 42.73 (11.29) |         | 20                           | 253.31 (82.68) |         | 20                         | 8.92 (3.52) |         |
| 7-12 months                     | 19                       | 40.94 (6.00)  | 0,539   | 19                           | 224.66 (39.36) | 0,175   | 18                         | 7.01 (2.06) | 0,047   |
| Nutritional status on day of PK |                          |               |         |                              |                |         |                            |             |         |
| ≥-2.0                           | 21                       | 39.37 (5.26)  |         | 21                           | 214.72 (31.45) |         | 21                         | 7.83 (3.59) |         |
| <-2.0                           | 18                       | 44.75 (11.55) | 0,082   | 18                           | 268.09 (83.45) | 0,018   | 17                         | 8.25 (2.29) | 0,679   |
| Prematurity                     |                          |               |         |                              |                |         |                            |             |         |
| Term (38+ weeks)                | 24                       | 41.98 (8.69)  |         | 24                           | 237.88 (60.51) |         | 24                         | 8.37 (3.55) |         |
| Premature (<37 weeks)           | 15                       | 41.66 (9.86)  | 0,917   | 15                           | 241.71 (76.26) | 0,863   | 14                         | 7.41 (1.87) | 0,285   |
| HIV status                      |                          |               |         |                              |                |         |                            |             |         |
| HIV-infected                    | 5                        | 35.56 (4.99)  |         | 5                            | 186.97 (27.05) |         | 5                          | 6.59 (1.71) |         |
| HIV-uninfected                  | 34                       | 42.78 (9.17)  | 0,096   | 34                           | 247.06 (66.77) | 0,056   | 33                         | 8.23 (3.16) | 0,266   |
| Ethnicity                       |                          |               |         |                              |                |         |                            |             |         |
| African                         | 29                       | 42.84 (9.08)  |         | 29                           | 244.74 (71.57) |         | 28                         | 7.73 (2.27) |         |
| Mixed race                      | 10                       | 38.99 (8.71)  | 0,250   | 10                           | 223.74 (46.02) | 0,393   | 10                         | 8.82 (4.65) | 0,489   |
| Gender                          |                          |               |         |                              |                |         |                            |             |         |
| Female                          | 13                       | 40.84 (7.42)  |         | 13                           | 229.69 (56.22) |         | 13                         | 7.92 (2.60) |         |
| Male                            | 26                       | 42.36 (9.84)  | 0,626   | 26                           | 244.18 (71.00) | 0,526   | 25                         | 8.06 (3.30) | 0,892   |

**Table S2. Pyrazinamide pharmacokinetic parameters by age, nutritional status, prematurity, HIV status, ethnicity, and gender (n = 39)**

WAZ, weight for age Z score; C<sub>max</sub>, maximum drug concentration in serum; AUC, the area under the concentration-time curve; t<sub>1/2</sub>, half-life of the drug; SD, standard deviation

|                                 | C <sub>max</sub> (µg/ml) |             |         | AUC <sub>0-8</sub> (µg-h/ml) |             |         | t <sub>1/2</sub> (µg-h/ml) |             |         |
|---------------------------------|--------------------------|-------------|---------|------------------------------|-------------|---------|----------------------------|-------------|---------|
|                                 | N                        | Mean (SD)   | p-value | N                            | Mean (SD)   | p-value | N                          | Mean (SD)   | p-value |
| Age at PK sampling              |                          |             |         |                              |             |         |                            |             |         |
| 0-6 months                      | 10                       | 1.33 (0.54) |         | 10                           | 5.29 (2.05) |         | 9                          | 3.79 (1.63) |         |
| 7-12 months                     | 6                        | 1.14 (0.43) | 0,486   | 6                            | 4.75 (1.66) | 0,590   | 6                          | 3.28 (1.20) | 0,530   |
| Nutritional status on day of PK |                          |             |         |                              |             |         |                            |             |         |
| ≥-2.0                           | 9                        | 1.19 (0.52) |         | 9                            | 4.82 (1.80) |         | 9                          | 3.55 (1.56) |         |
| <-2.0                           | 7                        | 1.35 (0.49) | 0,543   | 7                            | 5.43 (2.05) | 0,540   | 6                          | 3.65 (1.41) | 0,903   |
| Prematurity                     |                          |             |         |                              |             |         |                            |             |         |
| Term (38+ weeks)                | 10                       | 1.11 (0.52) |         | 10                           | 4.48 (2.07) |         | 9                          | 3.49 (1.37) |         |
| Premature (<37 weeks)           | 6                        | 1.50 (0.38) | 0,125   | 6                            | 6.11 (0.87) | 0,091   | 6                          | 3.73 (1.69) | 0,768   |
| HIV status                      |                          |             |         |                              |             |         |                            |             |         |
| HIV-infected                    | 2                        | 0.39 (0.22) |         | 2                            | 2.04 (1.13) |         | 2                          | 3.32 (2.42) |         |
| HIV-uninfected                  | 14                       | 1.38 (0.39) | 0,004   | 14                           | 5.52 (1.52) | 0,008   | 13                         | 3.63 (1.40) | 0,791   |
| Ethnicity                       |                          |             |         |                              |             |         |                            |             |         |
| African                         | 11                       | 1.23 (0.52) |         | 11                           | 4.83 (1.64) |         | 10                         | 3.64 (1.65) |         |
| Mixed race                      | 5                        | 1.31 (0.49) | 0,763   | 5                            | 5.67 (2.41) | 0,424   | 5                          | 3.47 (1.11) | 0,835   |
| Gender                          |                          |             |         |                              |             |         |                            |             |         |
| Female                          | 4                        | 1.27 (0.33) |         | 4                            | 5.15 (1.19) |         | 4                          | 4.17 (2.08) |         |
| Male                            | 12                       | 1.25 (0.55) | 0,955   | 12                           | 5.07 (2.10) | 0,946   | 11                         | 3.37 (1.21) | 0,368   |

**Table S3. Ethambutol pharmacokinetic parameters by age, nutritional status, prematurity, HIV status, ethnicity, and gender (n = 16)**

WAZ, weight for age Z score; C<sub>max</sub>, maximum drug concentration in serum; AUC, the area under the concentration-time curve; t<sub>1/2</sub>, half-life of the drug; SD, standard deviation
